# Supplementary material for: Pest control of aphids depends on landscape complexity and natural enemy interactions
Source: PubMed Central journal article supplement (PMC4699780; doi:10.7717/peerj.1095), 2015-07-16

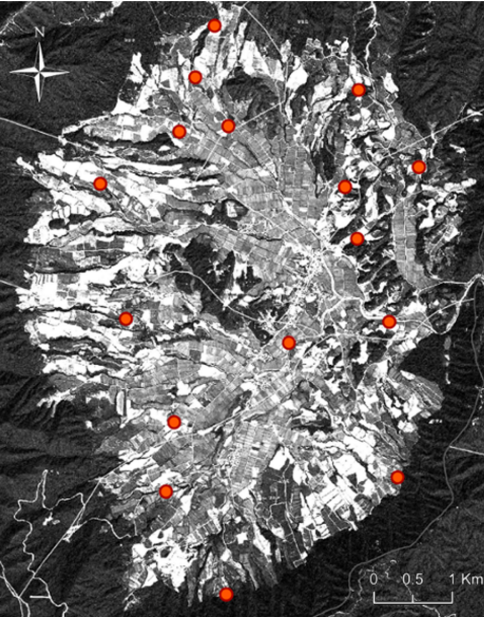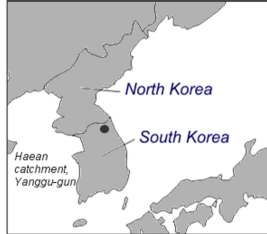

Supplement: peerj-03-1095-s004.pdf [file peerj-03-1095-s004.pdf]
